# Supplementary material for: Effect of Acceptance Versus Attention on Pain Tolerance: Dissecting Two Components of Mindfulness
Source: Springer Nature journal article supplement (doi:10.1007/s12671-019-1091-8), 2019-02-01
Supplement: MOESM1 [file 16439204]

**Supplementary Materials**

**Instructions for the pain attention group**

Part 1

Please read the instructions carefully before proceeding with the subsequent cold pressure task, and follow the instructions to practice:

Please adjust your body posture. If you like, close your eyes. Allow yourself to do the following exercises with a sense of relaxed curiosity.

The core of this exercise is being aware of the movement of breath in and out in the space below your nose and above your upper lip. There’s no need to control the breath. Just breathe normally.

When experiencing a feeling of discomfort and having a thought such as “It is unbearable for me” or “I should do something to change the situation”, please do not respond them immediately as a fact, but just try to notice these thoughts and observe them as a kind of inner experience from time to time.

At some point, you may notice your attention has wandered from the breath. That’s okay. Just gently place it back on the breath.

Please experience this process and continue to the next part after breathing ten times.

(After subjects experienced the training, experimenter asks subjects whether he/she had questions about the process)

Part 2

Next, continue to observe your breathing process using the same method. Every once in a while, you may hear the bell ring. If your attention is just on your breath at that time, please press the counter in your hand.

When the bell rings, DO NOT press the counter under these conditions:

- Being distracted from external sounds, feelings or internal thoughts, etc.
- Being awakened by the sound of the bell, and immediately focus on the breath.
- Reasoning, imagination while knowing the flow of the breath.

The counting number is not good or bad. It just reflects the current state.

If you have understood the above instructions, you can start the training.

(Subject starts the training)

Part 3

Please summarize the breathing process.

In the following cold pressure task, please take the sensations of your hand as the objective of observation. For example, you can experience

- The different pain sensations between various positions
- The feeling of sensation (e.g. sharp or dull)
- The increase and decrease of pain sensation

**Instructions for the pain acceptance group**

Part 1

Please read the instructions carefully before proceeding with the subsequent cold pressure task, and follow the instructions to practice:

Please write down three thoughts that you had when you decided to end the previous cold pressor task. *(The aim of the exercise was to teach the participants to notice their thoughts.)*

(1)

(2)

(3)

Part 2

Please walk round the room while repeating the phrase “I cannot walk” aloud.

Please summarize the process.

*(The aim of the exercise was to teach the participants to disconnect what they say to themselves from what they actually do.)*

Part 3

What we've just practiced tells us that when our thoughts, feelings are inconsistent with our behaviors, we can go on with them without changing them or being controlled.

The "walk round the room" exercise was an example of a possible disconnection between thoughts and behavior. Although we have the idea of "I cannot walk", we can continue to walk.

It is the same when we experience pain. When the body is in pain, we have all kinds of feelings, such as "tingling" and "numbness". Or there are all kinds of thoughts, such as "My hand hurts and I can't stand them" and "I want to give up". These feelings and thoughts are trying to interrupt what we are doing. We can try to continue to experiment with ice water with the thought of "my hand hurts too much", as we did in the exercise.

Imagine that continuing with the next cold pressure task was comparable to crossing a muddy swamp. The best way to cross the swamp was just to notice any unpleasant thoughts and feelings and carry them as you continued to the other side of the swamp, because you could have those thoughts and act differently to what you thought or felt.

During the next cold pressure task, you can notice cold water related thoughts and feelings, but continue with the task, regardless of the content of them.
